# Supplementary material for: Association of fried food consumption with all cause, cardiovascular, and cancer mortality: prospective cohort study
Source: PubMed Central journal article supplement — BMJ. 2019 Jan 23;364:k5420. doi: 10.1136/bmj.k5420 (PMC6342269; doi:10.1136/bmj.k5420), 2019-01-23
Supplement: suny045271.ww.pdf [file suny045271.ww.pdf]

**eTable 1 Different fried food groups in Women's Health Initiative**

**eTable 2 Sensitivity analysis of the association of total fried food consumption with all cause and cause specific mortality**

**eTable 3 Sensitivity analysis of the association of individual fried food consumption with all cause and cause specific mortality**

**eTable 4 Stratified analysis of the association of fried food consumption with all cause mortality**

**eTable 5 Stratified analysis of the association of fried food consumption with cardiovascular mortality**

**eTable 6 Stratified analysis of the association of fried food consumption with cancer mortality**

**eTable 1 Different fried food groups in Women’s Health Initiative**

| <b>Fried food groups</b> |                      | <b>Items on the FFQ</b>                                              | <b>Screenshot of the FFQ</b>                                                                  |                                                                                                |
|--------------------------|----------------------|----------------------------------------------------------------------|-----------------------------------------------------------------------------------------------|------------------------------------------------------------------------------------------------|
| Total fried foods        | Fried chicken        | Fried chicken                                                        | Fried chicken                                                                                 |                                                                                                |
|                          | Fried fish/shellfish | Fried fish, fish sandwich, and fried shellfish (shrimp and oysters)  | Fried fish, fish sandwich, and fried shellfish (shrimp, oysters)                              |                                                                                                |
|                          | Other fried foods    | French fries, fried potatoes, fried rice, fried cassava and fritters | French fries, fried potatoes, fried rice, fried cassava and fritters                          | French fries, fried potatoes, fried rice, fried cassava and fritters                           |
|                          |                      |                                                                      | Snacks such as potato chips, corn chips, tortilla chips, pork skins, Ritz and cheese crackers | Snacks such as potato chips, corn chips, tortilla chips, pork skins, Ritz® and cheese crackers |
|                          |                      | Fried plantains                                                      | Plantains, fried                                                                              |                                                                                                |
|                          |                      | Taco and tostada                                                     | Taco and tostada                                                                              |                                                                                                |
|                          |                      | Flauta and crispy rolled taco                                        | Flauta and crispy rolled taco                                                                 |                                                                                                |
|                          | Indian fried bread   | Indian fry bread                                                     |                                                                                               |                                                                                                |

**eTable 2 Sensitivity analysis of the association of total fried food consumption with all cause and cause specific mortality**

| <b>Mortality</b>                | <b>None</b> | <b>&lt;1 serving/week</b> | <b>1-2 servings/week</b> | <b>3-6 servings/week</b> | <b>≥1 serving/day</b> | <b>P-trend</b> |
|---------------------------------|-------------|---------------------------|--------------------------|--------------------------|-----------------------|----------------|
| <b>All cause mortality</b>      |             |                           |                          |                          |                       |                |
| OS only                         | 1.00(Ref)   | 1.01(0.97 to 1.05)        | 1.02(0.98 to 1.06)       | 1.03(0.98 to 1.09)       | 1.06(0.99 to 1.15)    | 0.06           |
| Frying oil added                | 1.00(Ref)   | 1.02(0.99 to 1.06)        | 1.03(0.99 to 1.07)       | 1.04(0.99 to 1.08)       | 1.08(1.02 to 1.16)    | 0.02           |
| <i>Trans</i> fat intake added   | 1.00(Ref)   | 1.01(0.98 to 1.05)        | 1.03(0.99 to 1.07)       | 1.03(0.99 to 1.08)       | 1.08(1.01 to 1.16)    | 0.03           |
| <b>Cardiovascular mortality</b> |             |                           |                          |                          |                       |                |
| OS only                         | 1.00(Ref)   | 0.99(0.92 to 1.06)        | 1.01(0.94 to 1.09)       | 1.02(0.93 to 1.12)       | 1.09(0.95 to 1.24)    | 0.23           |
| Frying oil added                | 1.00(Ref)   | 1.01(0.94 to 1.07)        | 1.04(0.97 to 1.11)       | 1.00(0.92 to 1.09)       | 1.08(0.96 to 1.22)    | 0.31           |
| <i>Trans</i> fat intake added   | 1.00(Ref)   | 1.00(0.94 to 1.07)        | 1.04(0.97 to 1.11)       | 1.01(0.93 to 1.10)       | 1.11(0.98 to 1.25)    | 0.18           |
| <b>Cancer mortality</b>         |             |                           |                          |                          |                       |                |
| OS only                         | 1.00(Ref)   | 1.02(0.95 to 1.10)        | 1.00(0.93 to 1.09)       | 0.98(0.89 to 1.08)       | 0.90(0.78 to 1.04)    | 0.25           |
| Frying oil added                | 1.00(Ref)   | 1.04(0.97 to 1.11)        | 1.02(0.95 to 1.10)       | 1.02(0.93 to 1.11)       | 0.95(0.83 to 1.08)    | 0.66           |
| <i>Trans</i> fat intake added   | 1.00(Ref)   | 1.03(0.96 to 1.10)        | 1.02(0.95 to 1.09)       | 1.01(0.93 to 1.11)       | 0.95(0.83 to 1.09)    | 0.71           |

Results were based on multivariable model 2.

Abbreviations: OS, observational study.

**eTable 3 Sensitivity analysis of the association of individual fried food consumption with all cause and cause specific mortality**

| <b>Mortality</b>                | <b>None</b> | <b>&lt;2 servings/month</b> | <b>2-3 servings/month</b> | <b>≥1 serving/week</b> | <b>P-trend</b> |
|---------------------------------|-------------|-----------------------------|---------------------------|------------------------|----------------|
| <b>All cause mortality</b>      |             |                             |                           |                        |                |
| Fried chicken                   |             |                             |                           |                        |                |
| OS only                         | 1.00(Ref)   | 1.07(1.03 to 1.10)          | 1.13(1.08 to 1.18)        | 1.14(1.08 to 1.21)     | <0.001         |
| Frying oil added                | 1.00(Ref)   | 1.06(1.03 to 1.09)          | 1.12(1.07 to 1.16)        | 1.12(1.07 to 1.18)     | <0.001         |
| <i>Trans</i> fat intake added   | 1.00(Ref)   | 1.06(1.03 to 1.10)          | 1.12(1.08 to 1.17)        | 1.13(1.07 to 1.19)     | <0.001         |
| Fried fish/shellfish            |             |                             |                           |                        |                |
| OS only                         | 1.00(Ref)   | 0.96(0.93 to 0.99)          | 0.98(0.94 to 1.02)        | 1.06(1.01 to 1.12)     | 0.36           |
| Frying oil added                | 1.00(Ref)   | 0.97(0.95 to 1.01)          | 1.00(0.96 to 1.03)        | 1.08(1.03 to 1.13)     | 0.04           |
| <i>Trans</i> fat intake added   | 1.00(Ref)   | 0.97(0.94 to 0.99)          | 0.99(0.96 to 1.03)        | 1.08(1.03 to 1.12)     | 0.06           |
| Other fried foods               |             |                             |                           |                        |                |
| OS only                         | 1.00(Ref)   | 1.02(0.98 to 1.06)          | 1.00(0.96 to 1.04)        | 0.98(0.94 to 1.02)     | 0.04           |
| Frying oil added                | 1.00(Ref)   | 1.02(0.98 to 1.05)          | 0.99(0.95 to 1.03)        | 0.98(0.95 to 1.02)     | 0.08           |
| <i>Trans</i> fat intake added   | 1.00(Ref)   | 1.01(0.98 to 1.05)          | 0.98(0.95 to 1.02)        | 0.98(0.95 to 1.02)     | 0.07           |
| <b>Cardiovascular mortality</b> |             |                             |                           |                        |                |
| Fried chicken                   |             |                             |                           |                        |                |
| OS only                         | 1.00(Ref)   | 1.08(1.02 to 1.15)          | 1.20(1.11 to 1.31)        | 1.16(1.04 to 1.29)     | <0.001         |
| Frying oil added                | 1.00(Ref)   | 1.08(1.02 to 1.14)          | 1.16(1.08 to 1.25)        | 1.11(1.01 to 1.22)     | <0.001         |
| <i>Trans</i> fat intake added   | 1.00(Ref)   | 1.08(1.02 to 1.14)          | 1.17(1.09 to 1.26)        | 1.13(1.03 to 1.25)     | <0.001         |
| Fried fish/shellfish            |             |                             |                           |                        |                |
| OS only                         | 1.00(Ref)   | 0.99(0.93 to 1.05)          | 0.97(0.90 to 1.05)        | 1.12(1.02 to 1.22)     | 0.17           |
| Frying oil added                | 1.00(Ref)   | 1.01(0.96 to 1.06)          | 0.98(0.92 to 1.05)        | 1.14(1.05 to 1.23)     | 0.04           |
| <i>Trans</i> fat intake added   | 1.00(Ref)   | 1.01(0.95 to 1.06)          | 0.98(0.92 to 1.05)        | 1.14(1.06 to 1.24)     | 0.03           |
| Other fried foods               |             |                             |                           |                        |                |
| OS only                         | 1.00(Ref)   | 0.98(0.92 to 1.05)          | 0.95(0.88 to 1.02)        | 0.94(0.88 to 1.01)     | 0.05           |
| Frying oil added                | 1.00(Ref)   | 0.99(0.93 to 1.06)          | 0.96(0.90 to 1.03)        | 0.96(0.90 to 1.02)     | 0.10           |
| <i>Trans</i> fat intake added   | 1.00(Ref)   | 0.99(0.93 to 1.05)          | 0.96(0.90 to 1.03)        | 0.96(0.91 to 1.02)     | 0.15           |
| <b>Cancer mortality</b>         |             |                             |                           |                        |                |
| Fried chicken                   |             |                             |                           |                        |                |
| OS only                         | 1.00(Ref)   | 1.02(0.96 to 1.09)          | 0.96(0.87 to 1.05)        | 1.01(0.90 to 1.14)     | 0.76           |
| Frying oil added                | 1.00(Ref)   | 1.02(0.96 to 1.08)          | 0.98(0.91 to 1.07)        | 1.03(0.93 to 1.14)     | 0.85           |
| <i>Trans</i> fat intake added   | 1.00(Ref)   | 1.02(0.96 to 1.08)          | 0.99(0.91 to 1.07)        | 1.04(0.94 to 1.15)     | 0.77           |
| Fried fish/shellfish            |             |                             |                           |                        |                |
| OS only                         | 1.00(Ref)   | 0.89(0.84 to 0.95)          | 0.98(0.91 to 1.06)        | 1.01(0.92 to 1.11)     | 0.61           |
| Frying oil added                | 1.00(Ref)   | 0.92(0.87 to 0.97)          | 0.99(0.93 to 1.07)        | 1.06(0.97 to 1.15)     | 0.64           |
| <i>Trans</i> fat intake added   | 1.00(Ref)   | 0.92(0.87 to 0.97)          | 0.99(0.92 to 1.07)        | 1.06(0.97 to 1.15)     | 0.64           |
| Other fried foods               |             |                             |                           |                        |                |
| OS only                         | 1.00(Ref)   | 1.09(1.02 to 1.18)          | 1.08(0.99 to 1.17)        | 1.04(0.96 to 1.11)     | 0.96           |
| Frying oil added                | 1.00(Ref)   | 1.09(1.02 to 1.17)          | 1.06(0.98 to 1.14)        | 1.04(0.97 to 1.11)     | 0.88           |
| <i>Trans</i> fat intake added   | 1.00(Ref)   | 1.09(1.02 to 1.17)          | 1.06(0.98 to 1.14)        | 1.04(0.97 to 1.11)     | 0.87           |

Results were based on multivariable model 2.

Abbreviations: OS, observational study.

**eTable 4 Stratified analysis of the association of fried food consumption with all cause mortality**

| <b>Fried food items</b>   | <b>None</b> | <b>&lt;1 serving/week</b>   | <b>1-2 servings/week</b>  | <b>3-6 servings/week</b> | <b>≥1 serving/day</b> | <b>P-trend</b>       | <b>P-interaction</b> |
|---------------------------|-------------|-----------------------------|---------------------------|--------------------------|-----------------------|----------------------|----------------------|
| <b>Total fried foods</b>  |             |                             |                           |                          |                       |                      |                      |
| Age                       |             |                             |                           |                          |                       |                      |                      |
| <65                       | 1.00(Ref)   | 1.03(0.96 to 1.11)          | 0.99(0.92 to 1.08)        | 1.00(0.91 to 1.09)       | 1.10(0.98 to 1.24)    | 0.71                 | 0.07                 |
| ≥65                       | 1.00(Ref)   | 1.01(0.97 to 1.05)          | 1.05(1.01 to 1.09)        | 1.05(0.99 to 1.10)       | 1.04(0.95 to 1.13)    | 0.03                 |                      |
| Smoking status            |             |                             |                           |                          |                       |                      |                      |
| Never smoked              | 1.00(Ref)   | 0.99(0.94 to 1.04)          | 0.99(0.94 to 1.04)        | 1.00(0.93 to 1.07)       | 1.16(1.05 to 1.28)    | 0.17                 | <0.001               |
| Ever smoked               | 1.00(Ref)   | 1.05(0.99 to 1.10)          | 1.08(1.03 to 1.14)        | 1.09(1.02 to 1.16)       | 1.08(0.99 to 1.18)    | 0.004                |                      |
| Unopposed estrogen use    |             |                             |                           |                          |                       |                      |                      |
| Never used                | 1.00(Ref)   | 1.03(0.99 to 1.08)          | 1.04(0.99 to 1.09)        | 1.07(1.01 to 1.13)       | 1.12(1.03 to 1.21)    | 0.01                 | 0.13                 |
| Ever used                 | 1.00(Ref)   | 0.98(0.92 to 1.04)          | 1.00(0.94 to 1.06)        | 0.97(0.90 to 1.05)       | 1.02(0.91 to 1.15)    | 0.99                 |                      |
| Estrogen+progesterone use |             |                             |                           |                          |                       |                      |                      |
| Never used                | 1.00(Ref)   | 1.02(0.98 to 1.06)          | 1.04(1.01 to 1.09)        | 1.06(1.01 to 1.11)       | 1.12(1.04 to 1.20)    | 0.001                | 0.13                 |
| Ever used                 | 1.00(Ref)   | 1.00(0.93 to 1.09)          | 1.00(0.93 to 1.09)        | 0.96(0.88 to 1.05)       | 0.93(0.84 to 1.04)    | 0.09                 |                      |
| Obesity                   |             |                             |                           |                          |                       |                      |                      |
| No                        | 1.00(Ref)   | 1.00(0.96 to 1.04)          | 1.02(0.97 to 1.06)        | 1.02(0.97 to 1.08)       | 1.06(0.97 to 1.16)    | 0.12                 | 0.16                 |
| Yes                       | 1.00(Ref)   | 1.05(0.97 to 1.13)          | 1.02(0.95 to 1.10)        | 1.01(0.93 to 1.10)       | 1.07(0.96 to 1.20)    | 0.81                 |                      |
|                           | <b>None</b> | <b>&lt;2 servings/month</b> | <b>2-3 servings/month</b> | <b>≥1 serving/week</b>   | <b>P-trend</b>        | <b>P-interaction</b> |                      |
| <b>Fried chicken</b>      |             |                             |                           |                          |                       |                      |                      |
| Age                       |             |                             |                           |                          |                       |                      |                      |
| <65                       | 1.00(Ref)   | 1.11(1.05 to 1.18)          | 1.09(1.01 to 1.18)        | 1.15(1.05 to 1.26)       | <0.001                | <0.001               |                      |
| ≥65                       | 1.00(Ref)   | 1.04(1.01 to 1.08)          | 1.13(1.08 to 1.19)        | 1.10(1.03 to 1.17)       | <0.001                |                      |                      |
| Smoking status            |             |                             |                           |                          |                       |                      |                      |
| Never smoked              | 1.00(Ref)   | 1.09(1.04 to 1.13)          | 1.11(1.05 to 1.18)        | 1.17(1.08 to 1.26)       | <0.001                | 0.02                 |                      |
| Ever smoked               | 1.00(Ref)   | 1.07(1.02 to 1.11)          | 1.15(1.09 to 1.22)        | 1.13(1.05 to 1.22)       | <0.001                |                      |                      |
| Unopposed estrogen use    |             |                             |                           |                          |                       |                      |                      |
| Never used                | 1.00(Ref)   | 1.07(1.03 to 1.12)          | 1.10(1.04 to 1.15)        | 1.12(1.05 to 1.19)       | <0.001                | 0.13                 |                      |
| Ever used                 | 1.00(Ref)   | 1.04(0.99 to 1.10)          | 1.16(1.08 to 1.24)        | 1.14(1.05 to 1.25)       | <0.001                |                      |                      |
| Estrogen+progesterone use |             |                             |                           |                          |                       |                      |                      |
| Never used                | 1.00(Ref)   | 1.06(1.03 to 1.10)          | 1.12(1.07 to 1.17)        | 1.12(1.06 to 1.18)       | <0.001                | 0.74                 |                      |
| Ever used                 | 1.00(Ref)   | 1.08(1.01 to 1.16)          | 1.10(0.99 to 1.21)        | 1.18(1.02 to 1.36)       | 0.01                  |                      |                      |
| Obesity                   |             |                             |                           |                          |                       |                      |                      |
| No                        | 1.00(Ref)   | 1.05(1.01 to 1.09)          | 1.11(1.06 to 1.17)        | 1.14(1.06 to 1.22)       | <0.001                | 0.21                 |                      |
| Yes                       | 1.00(Ref)   | 1.08(1.02 to 1.14)          | 1.11(1.04 to 1.19)        | 1.08(0.99 to 1.18)       | 0.003                 |                      |                      |

| <b>Fried fish/shellfish</b>      |           |                    |                    |                    |      |        |
|----------------------------------|-----------|--------------------|--------------------|--------------------|------|--------|
| <b>Age</b>                       |           |                    |                    |                    |      |        |
| <65                              | 1.00(Ref) | 0.98(0.93 to 1.04) | 0.99(0.93 to 1.06) | 1.13(1.05 to 1.23) | 0.03 | <0.001 |
| ≥65                              | 1.00(Ref) | 0.97(0.94 to 1.01) | 0.99(0.95 to 1.04) | 1.05(0.99 to 1.11) | 0.39 |        |
| <b>Smoking status</b>            |           |                    |                    |                    |      |        |
| Never smoked                     | 1.00(Ref) | 0.96(0.92 to 1.01) | 0.99(0.93 to 1.04) | 1.04(0.98 to 1.11) | 0.61 | 0.14   |
| Ever smoked                      | 1.00(Ref) | 0.98(0.95 to 1.03) | 1.00(0.95 to 1.05) | 1.10(1.03 to 1.17) | 0.04 |        |
| <b>Unopposed estrogen use</b>    |           |                    |                    |                    |      |        |
| Never used                       | 1.00(Ref) | 0.99(0.95 to 1.03) | 0.98(0.94 to 1.03) | 1.09(1.03 to 1.15) | 0.07 | 0.01   |
| Ever used                        | 1.00(Ref) | 0.94(0.90 to 0.99) | 1.01(0.95 to 1.07) | 1.04(0.97 to 1.12) | 0.59 |        |
| <b>Estrogen+progesterone use</b> |           |                    |                    |                    |      |        |
| Never used                       | 1.00(Ref) | 0.97(0.94 to 0.99) | 0.99(0.95 to 1.03) | 1.09(1.04 to 1.14) | 0.04 | 0.45   |
| Ever used                        | 1.00(Ref) | 0.98(0.92 to 1.05) | 1.00(0.92 to 1.10) | 0.99(0.88 to 1.11) | 0.89 |        |
| <b>Obesity</b>                   |           |                    |                    |                    |      |        |
| No                               | 1.00(Ref) | 0.98(0.94 to 1.01) | 1.00(0.96 to 1.05) | 1.03(0.97 to 1.09) | 0.58 | 0.06   |
| Yes                              | 1.00(Ref) | 0.95(0.90 to 1.01) | 0.96(0.90 to 1.02) | 1.12(1.04 to 1.21) | 0.08 |        |

Results were based on multivariable model 2.

**eTable 5 Stratified analysis of the association of fried food consumption with cardiovascular mortality**

| <b>Fried food items</b>     | <b>None</b> | <b>&lt;1 serving/week</b>   | <b>1-2 servings/week</b>  | <b>3-6 servings/week</b> | <b>≥1 serving/day</b> | <b><i>P</i>-trend</b>       | <b><i>P</i>-interaction</b> |
|-----------------------------|-------------|-----------------------------|---------------------------|--------------------------|-----------------------|-----------------------------|-----------------------------|
| <b>Total fried foods</b>    |             |                             |                           |                          |                       |                             |                             |
| Age                         |             |                             |                           |                          |                       |                             |                             |
| <65                         | 1.00(Ref)   | 0.98(0.83 to 1.16)          | 0.96(0.81 to 1.14)        | 0.97(0.80 to 1.18)       | 1.03(0.81 to 1.31)    | 0.99                        | 0.09                        |
| ≥65                         | 1.00(Ref)   | 1.01(0.94 to 1.08)          | 1.05(0.98 to 1.13)        | 1.00(0.91 to 1.10)       | 1.05(0.90 to 1.21)    | 0.37                        |                             |
|                             | <b>None</b> | <b>&lt;2 servings/month</b> | <b>2-3 servings/month</b> | <b>≥1 serving/week</b>   | <b><i>P</i>-trend</b> | <b><i>P</i>-interaction</b> |                             |
| <b>Fried chicken</b>        |             |                             |                           |                          |                       |                             |                             |
| Age                         |             |                             |                           |                          |                       |                             |                             |
| <65                         | 1.00(Ref)   | 1.16(1.02 to 1.31)          | 1.17(0.99 to 1.36)        | 1.21(1.01 to 1.45)       | 0.01                  | <0.001                      |                             |
| ≥65                         | 1.00(Ref)   | 1.06(0.99 to 1.13)          | 1.17(1.07 to 1.27)        | 1.05(0.94 to 1.17)       | 0.01                  |                             |                             |
| <b>Fried fish/shellfish</b> |             |                             |                           |                          |                       |                             |                             |
| Age                         |             |                             |                           |                          |                       |                             |                             |
| <65                         | 1.00(Ref)   | 1.09(0.96 to 1.23)          | 1.07(0.92 to 1.23)        | 1.29(1.10 to 1.52)       | 0.01                  | <0.001                      |                             |
| ≥65                         | 1.00(Ref)   | 0.99(0.93 to 1.05)          | 0.96(0.89 to 1.04)        | 1.09(0.99 to 1.19)       | 0.44                  |                             |                             |

Results were based on multivariable model 2.

**eTable 6 Stratified analysis of the association of fried food consumption with cancer mortality**

| <b>Fried food items</b>     | <b>None</b> | <b>&lt;1 serving/week</b>   | <b>1-2 servings/week</b>  | <b>3-6 servings/week</b> | <b>≥1 serving/day</b> | <b>P-trend</b>       | <b>P-interaction</b> |
|-----------------------------|-------------|-----------------------------|---------------------------|--------------------------|-----------------------|----------------------|----------------------|
| <b>Total fried foods</b>    |             |                             |                           |                          |                       |                      |                      |
| Estrogen+progesterone use   |             |                             |                           |                          |                       |                      |                      |
| Never used                  | 1.00(Ref)   | 1.00(0.93 to 1.09)          | 1.01(0.93 to 1.09)        | 1.01(0.91 to 1.11)       | 0.97(0.84 to 1.12)    | 0.93                 | 0.65                 |
| Ever used                   | 1.00(Ref)   | 1.11(0.96 to 1.28)          | 1.04(0.89 to 1.22)        | 1.01(0.83 to 1.22)       | 0.85(0.62 to 1.15)    | 0.33                 |                      |
| Obesity                     |             |                             |                           |                          |                       |                      |                      |
| No                          | 1.00(Ref)   | 1.02(0.95 to 1.10)          | 0.99(0.91 to 1.07)        | 1.00(0.90 to 1.11)       | 0.92(0.78 to 1.09)    | 0.40                 | 0.84                 |
| Yes                         | 1.00(Ref)   | 1.05(0.91 to 1.22)          | 1.06(0.91 to 1.23)        | 1.01(0.85 to 1.20)       | 1.01(0.85 to 1.20)    | 0.70                 |                      |
|                             | <b>None</b> | <b>&lt;2 servings/month</b> | <b>2-3 servings/month</b> | <b>≥1 serving/week</b>   | <b>P-trend</b>        | <b>P-interaction</b> |                      |
| <b>Fried chicken</b>        |             |                             |                           |                          |                       |                      |                      |
| Estrogen+progesterone use   |             |                             |                           |                          |                       |                      |                      |
| Never used                  | 1.00(Ref)   | 1.02(0.95 to 1.08)          | 0.97(0.89 to 1.07)        | 1.03(0.92 to 1.15)       | 0.98                  | 0.99                 |                      |
| Ever used                   | 1.00(Ref)   | 1.01(0.89 to 1.15)          | 1.03(0.86 to 1.24)        | 1.04(0.80 to 1.35)       | 0.73                  |                      |                      |
| Obesity                     |             |                             |                           |                          |                       |                      |                      |
| No                          | 1.00(Ref)   | 1.01(0.95 to 1.09)          | 0.97(0.88 to 1.08)        | 1.08(0.95 to 1.23)       | 0.65                  | 0.17                 |                      |
| Yes                         | 1.00(Ref)   | 0.99(0.89 to 1.10)          | 0.98(0.86 to 1.12)        | 0.94(0.80 to 1.11)       | 0.47                  |                      |                      |
| <b>Fried fish/shellfish</b> |             |                             |                           |                          |                       |                      |                      |
| Estrogen+progesterone use   |             |                             |                           |                          |                       |                      |                      |
| Never used                  | 1.00(Ref)   | 0.90(0.85 to 0.96)          | 0.99(0.92 to 1.07)        | 1.09(0.99 to 1.20)       | 0.36                  | 0.16                 |                      |
| Ever used                   | 1.00(Ref)   | 0.97(0.86 to 1.10)          | 0.98(0.84 to 1.15)        | 0.87(0.70 to 1.08)       | 0.32                  |                      |                      |
| Obesity                     |             |                             |                           |                          |                       |                      |                      |
| No                          | 1.00(Ref)   | 0.94(0.88 to 1.01)          | 0.98(0.90 to 1.07)        | 1.00(0.90 to 1.12)       | 0.68                  | 0.23                 |                      |
| Yes                         | 1.00(Ref)   | 0.87(0.78 to 0.97)          | 0.97(0.86 to 1.10)        | 1.11(0.97 to 1.28)       | 0.40                  |                      |                      |

Results were based on multivariable model 2.
